# Supplementary material for: QTL Analysis for Rice Quality-Related Traits and Fine Mapping of qWCR3
Source: MDPI journal article supplement (doi:10.3390/ijms25084389), 2024-04-16
Supplement: s1 [file s1]

**Table S1 Primers used in this study.**

| Name     | Forward primer (5'-3') | Reverse primer (3'-5')  |
|----------|------------------------|-------------------------|
| 2.32.3   | ATCATGTGCTAATGGAATGC   | GTCAATACCAGGAATCTCTTG   |
| 3.16.1   | AACGCAAACAACAACACGAA   | CCCCGAGATATCCATCAACA    |
| 4.30.6   | GATGATACAGGGTGATTAGTG  | AGATGATGCCAAATTAGGTG    |
| 4.34.0   | TGCACTTAAGAAACGTGTAAGC | GTGCTTTGTCGGTGCCATAG    |
| 9.2.0    | TCTGCTTTCCAACCGAAATC   | GGTTTCTGGTGTTTGGCTTT    |
| 9.8.0    | CAGCGTACACTAGGCACACG   | TGTTTAAAAGTCAACAACGCACA |
| 10.0.1   | ACCTTTTGCTGTTCGCAGAT   | TCAGGTGTGTGTACCTATGGTG  |
| 11.6.6   | TTATGAGGATAACCATGCTTGC | TATGGGCTAAATTACACGCTTTG |
| A1.40.39 | CAACAACGAGGACGATGA     | CGAACAAACTGGCTAATGAA    |
| A10.284  | CATGACTCGTGAGTAGCA     | CCAAACATTACCAAGTTCTG    |
| AY4292   | CCTTTGCAATGGTGAGCGAT   | ATCAGCTCTAGCCATGCTCC    |
| B1.40.61 | CTTCACCTACCAACCAATTC   | CAGCAGCAGTAACTGTAAC     |
| B10.389  | CCAGACACTGACAGTTAGG    | ACATCATTTCACACGGTTG     |
| C1.23.3  | TGCGTGTGATTTCCCTTG     | GTACTTATGCACCACCTGTA    |
| C3.26.6  | CACATGAAGCTCGACCAT     | ACACATCGCTCAGAATTAAC    |
| C9-12.3  | CCTCACCATACTCGACATC    | GGATGGACACCTTGATCG      |
| C10.13.5 | GAATAAGGACTTGGTGTTGAG  | CGCATTTACCCAAAGAAC      |
| C10.17.4 | CAACGAGAAGCTGCTTGC     | GCATACACTACAGTGCTCAA    |
| C11-3.5  | GAAGCATTTGCCAAAGAAC    | AGAAATACCGTCCAATCTCT    |

| Name    | Forward primer (5'-3')         | Reverse primer (3'-5')     |
|---------|--------------------------------|----------------------------|
| D1-8    | TTGGGTGAAGATGCAATATAATAAA      | TTTATCAACACCCAAGTACATCA    |
| D2-1    | GCAGATCAAGAGCTCAATGG           | CAATCAACACTCACATTCTCAGC    |
| D2-6    | GCTGCATCGATGGGAATAAG           | CGCCAACTTACAAGCGATGT       |
| D3-6    | ATAATACAGGGAGGAGCAAAGC         | CGCCGCATCCAGATTTATTA       |
| D5-5    | CGAGTATGATGGCCTAGACTTGA        | TTGATCAAACCTCCTCAATTCCTC   |
| D5-6    | CGATCATTGTCCACTTGACC           | CAGGCGAATTAACGTGATGA       |
| D10-11  | TGCTAATCCTTATATTCCCTCTGTG      | TGCTGTCCAAAGGACTGAGA       |
| D11-8   | TGGAATAAAATTAAACCCTTGAGC       | GCAGGAAAATTCAAGAGCAGA      |
| DD10-2  | GAGCTCACTATTCGCACTTCC          | GCTAGAAACTTGTAATTTTTCTTTTG |
| DD10-4  | AGATGAGCTTGGTGCAACACT          | CCAATTGCCGTTGTCCAT         |
| H1.25.1 | GCTCACTAAGATCCCATTTGA          | GACGGTAGTGTGATGAAGT        |
| H9.4.7  | GCTGAGTGCCACTGAAAT             | GTAGACGACCGCTTGATG         |
| RM5     | TGCAACTTCTAGCTGCTCGA           | GCATCCGATCTTGATGGG         |
| RM11    | TCTCCTCTTCCCCCGATC             | ATAGCGGGCGAGGCTTAG         |
| RM14    | CCGAGGAGAGGAGTTCGAC            | GTGCCAATTTCTCGAAAAA        |
| RM21    | ACAGTATTCCGTAGGCACGG           | GCTCCATGAGGGTGGTAGAG       |
| RM31    | GATCACGATCCACTGGAGCT           | AAGTCCATTACTCTCCTCCC       |
| RM104   | GGAAGAGGAGAGAAAGATGTGTGTCG     | TCAACAGACACACCGCCACCGC     |
| RM140   | TGCCTCTTCCCTGGCTCCCCTG         | GGCATGCCGAATGAAATGCATG     |
| RM160   | AGCTAGCAGCTATAGCTTAGCTGGAGATCG | TCTCATCGCCATGCGAGGCCTC     |
| RM162   | GCCAGCAAAACCAGGGATCCGG         | CAAGGTCTTGTGCGGCTTGCGG     |
| RM164   | TCTTGCCCGTCACTGCAGATATCC       | GCAGCCCTAATGCTACAATTCTTC   |
| RM172   | TGCAGCTGCGCCACAGCCATAG         | CAACCACGACACCGCCGTGTTG     |
| RM209   | ATATGAGTTGCTGTGCGTGCG          | CAACTTGCATCCTCCCCTCC       |
| RM218   | TGGTCAAACCAAGGTCCTTC           | GACATACATTCTACCCCCGG       |

| Name  | Forward primer (5'-3')     | Reverse primer (3'-5')  |
|-------|----------------------------|-------------------------|
| RM220 | GGAAGGTAAGTGTTCCTCAAC      | GAAATGCTTCCCACATGTCT    |
| RM228 | CTGGCCATTAGTCCTTGG         | GCTTGCGGCTCTGCTTAC      |
| RM259 | TGGAGTTTGAGAGGAGGG         | CTTGTTGCATGGTGCCATGT    |
| RM264 | GTTGCGTCCTACTGCTACTTC      | GATCCGTGTCGATGATTAGC    |
| RM267 | TGCAGACATAGAGAAGGAAGTG     | AGCAACAGCACAACTTGATG    |
| RM297 | TCTTTGGAGGCGAGCTGAG        | CGAAGGGTACATCTGCTTAG    |
| RM310 | CCAAAACATTTAAAATATCATG     | GCTTGTTGGTCATTACCATTTC  |
| RM327 | CTACTCCTCTGTCCCTCCTCTC     | CCAGCTAGACACAATCGAGC    |
| RM336 | CTTACAGAGAAACGGCATCG       | GCTGGTTTGTTCAGGTTTCG    |
| RM338 | CACAGGAGCAGGAGAAGAGC       | GGCAAACCGATCACTCAGTC    |
| RM340 | GGTAAATGGACAATCCTATGGC     | GACAAATATAAGGGCAGTGTGC  |
| RM345 | ATTGGTAGCTCAATGCAAGC       | GTGCAACAACCCACATG       |
| RM346 | CGAGAGAGCCCATAACTACG       | ACAAGACGACGAGGAGGGAC    |
| RM404 | CCAATCATTAACCCCTGAGC       | GCCTTCATGCTTCAGAAGAC    |
| RM405 | TCACACACTGACAGTCTGAC       | AATGTGGCACGTGAGGTAAG    |
| RM406 | GAGGGAGAAAGGTGGACATG       | TGTGCTCCTTGGGAAGAAAG    |
| RM407 | GATTGAGGAGACGAGCCATC       | CTTTTTCAGATCTGCGCTCC    |
| RM409 | CCGTCTCTTGCTAGGGATTC       | GGGGTGTTTTGCTTTCTCTG    |
| RM412 | CACTTGAGAAAGTTAGTGCAGC     | CCCAAACACACCCAAATAC     |
| RM414 | ATTGCAGTCATGCAGCAGTC       | ATATCTCCAATGTGGCAGGG    |
| RM418 | TCGCGTATCGTCATGCATAG       | GAGCACATATGCCACGTACG    |
| RM420 | GGACAGAATGTGAAGACAGTCG     | ACTAATCCACCAACGCATCC    |
| RM434 | GCCTCATCCCTCTAACCCTC       | CAAGAAAGATCAGTGCGTGG    |
| RM439 | CTGGGTCTAATCTCGTCCTAAATTGC | CGCCTCTCATAACAGTCCACTCC |
| RM459 | CTGCAATGCTGCATGACC         | CACTTTCTCTGCAGCACCAG    |

| Name  | Forward primer (5'-3')    | Reverse primer (3'-5')    |
|-------|---------------------------|---------------------------|
| RM478 | CAGCTGGGGAAGAGAGAGAG      | TCAGAAACTAAACGCACCCC      |
| RM480 | TGGTACTCACCATGCAAGTAGAACG | ATGCTCAAGCATTCTGCAGTTGG   |
| RM481 | TAGCTAGCCGATTGAATGGC      | CTCCACCTCCTATGTTGTTG      |
| RM486 | CCCCCTCTCTCTCTCTCTC       | TAGCCACATCAACAGCTTGC      |
| RM488 | AACAACCAGCGTATGCGTTCTCG   | CCCACGGCTTTGTAGGAAGAAGC   |
| RM501 | GCCCAATTAATGTACAGGCG      | ATATCGTTTAGCCGTGCTGC      |
| RM509 | TAGTGAGGGAGTGGAACGG       | ATCGTCCCCACAATCTCATC      |
| RM515 | TAGGACGACCAAAGGGTGAG      | TGGCCTGCTCTCTCTCTCTC      |
| RM518 | CTCTTCACTCACTCACCATGG     | ATCCATCTGGAGCAAGCAAC      |
| RM525 | GGCCCGTCCAAGAAATATTG      | CGGTGAGACAGAATCCTTACG     |
| RM527 | GGCTCGATCTAGAAAATCCG      | TTGCACAGGTTGCGATAGAG      |
| RM536 | TCTCTCCTCTTGTGTTGGCTC     | ACACACCAACACGACCACAC      |
| RM541 | TATAACCGACCTCAGTGCCC      | CCTTACTCCCATGCCATGAG      |
| RM545 | CAATGGCAGAGACCCAAAAG      | CTGGCATGTAACGACAGTGG      |
| RM556 | ACTCAAACCTCACTGCACC       | TAGCACACTGAACAGCTGGC      |
| RM583 | AGATCCATCCCTGTGGAGAG      | GCGAACTCGCGTTGTAATC       |
| RM586 | ACCTCGCGTTATTAGGTACCC     | GAGATACGCCAACGAGATACC     |
| T2-1  | GGAGATAAGAACTCCATCCACAA   | GCTACGTTTCATTTGCCATT      |
| T2-2  | CCAAGTGCCGATTTGTTCA       | CGAATTGTTTTCTATGAAATTCCTG |
| T3-1  | CATTGGTTGGTAATTGGATGG     | TGTGCCACATCCACTCATTAT     |
| T3-4  | TACAAAGGTGCGCAGCATAC      | CCTGCTGTGTGTGGGAAAG       |
| T4-6  | TCCGAGCTTGATGAGATTGA      | GCTTTTTGGCAGTGCACATT      |
| T7-3  | AACCTAGAGGCCGGGAGTAT      | CCGCATTTCATTATATAATTGTG   |
| TT2-4 | CAACGCCTACAGCAACAT        | CGGATCTTGGGATGAGTTC       |
| TT4-8 | GTGACTGTGAGCAGATGA        | GGAATCAGGATTACAGTAGATG    |

| Name    | Forward primer (5'-3') | Reverse primer (3'-5') |
|---------|------------------------|------------------------|
| TT5-1   | GGTAGATTCTGGTTGCCTATA  | GCTAGTGGAGAAAGAACTAAAG |
| TT5-2   | GGCGGTTAGATCATCAGG     | CCTTCTCCACATCCAACCTC   |
| TT6-1   | ACTGTTTCGCTCGTAAGTG    | GCTTAGCCACAAGTGAAAC    |
| TT9-3   | TATAATGGAAGGTCTGGAGAG  | GAATCTATCGGTCGGGAAT    |
| Z1-18.0 | CCCATACACATATCTACATTCC | ATTGGTCAGCGTGAAAGT     |
| Z1-28.1 | GCTATAAGACACGGATGCT    | GAATGACTGTGAGTTAAGGAG  |
| Z2-23.9 | TTGGATCACTAGCCTGCAA    | TGGATATCTCACGGCTTTGTC  |
| Z2-25.7 | GCACCTAGCAATATACTACTAC | CAGACTACTCTTCCGATGG    |
| Z3-10.3 | TTTACGAGGTTGGGTTTCG    | CCGGTTGATACATCACCTAT   |
| Z3-11.0 | TTCCTATTCATTACGACGA    | GCTCCTTTGGACCGTTAA     |
| Z3-14.8 | TGGTTGGTTAGTAGACTGAA   | CCGTCCACCTCACATTGA     |
| Z3-17.6 | TATATCGCTGCCTGATGC     | GCGGAAGCAGTAACCTTG     |
| Z3-29.1 | GTCCATTTGTTACCTAAAGG   | TTGGCAGCGGAAATCATT     |
| Z4-4.0  | GAAGGACATCAAGGAGATATG  | CAGATCTTGCATAGAACGAA   |
| Z4-6.0  | CCAACAAAGAGGAACGCAAT   | ATTCGCAAATTTGTCCATCA   |
| Z4-12.0 | ATGGTGGTGGTATGGAGG     | GCTTCTGAAAGTACGTTTGG   |
| Z4-14.3 | TGCTTGTGTCCTATAGTGG    | AATTCCTTGCAGTTCTTGTC   |
| Z4-17.7 | ATAGATGGTGCGGCAGTT     | GCTTTACTCGCTTCTTCACA   |
| Z4-20.6 | GGGTTTGAATTCTAGAGACG   | GCTTCCCACCTTCTCTTT     |
| Z4-26.5 | GAGAAGGCTCACTCTATCAT   | ATGTAACCTAACGGATGGAT   |
| Z4-35.1 | GGATACCTTGGATTGGAGTG   | CCCGTCTTTAATACTGTTTCC  |
| Z5-5.1  | AAGTGAGGCGTGAGTCTC     | CTTCCACTGACATCCACATAA  |
| Z5-7.2  | GGTGTAAGTAGATGCAGCA    | ATCCAATGATGCGTACTACT   |
| Z5-9.7  | GCTCTTCCTTAAAGGCAATG   | AAGTCTCTGTAAACACTCCA   |
| Z5-13.0 | CCGACCATAGGATTAGACAA   | ATCACCGCATCACCAGAT     |

| Name     | Forward primer (5'-3') | Reverse primer (3'-5') |
|----------|------------------------|------------------------|
| Z5-24.3  | TGGTCTCACTCTCTGTTAT    | CCATCTACTGTTTACTCAAG   |
| Z6-21.9  | TCGTATTACATCCGAGGAA    | GCATGTAGCCGATGACCTTA   |
| Z6-6.0   | GATGGTATACTGTCCTTGTAAG | AACTGATAATTACACCCTTGG  |
| Z7-3.9   | GTGGTCCCTAACTCAAACA    | GGAAACGTCACATTCATAGA   |
| Z7-5.4   | CAGTCAACCGACGAGATT     | GTGTTTCTACCTTATCCTCCT  |
| Z7-11.7  | CGACGACACAACAAACAC     | GGCATTCTTTCCTTTCAACA   |
| Z7-24.5  | TTAACTTGCTCTGACTGAGA   | GCCTCCAGACTAGACCAA     |
| Z7-28.3  | CGGTGGTGCTCTATCAGT     | TCGTTACATCCAAACAAGT    |
| Z7-29.1  | CGCAATGTTGATACTGAA     | AACTGAGGCATTGGTAGTAA   |
| Z8-8.1   | TTGCATGAGGGCTGGTTTAT   | GGCCCTCCGGAGATTTTA     |
| Z8-17.5  | CCGCAATCCGAAGACTCT     | AGCATCTCAGAACTGGTATG   |
| Z8-19.4  | CCTAATCACCGCCTTCCA     | TGACATAGATGGTAGCATAGAC |
| Z8-25.3  | GCATTGGCACACCTAGAC     | CTGGAAAGTAAGTGCGATTT   |
| Z9-3.4   | TTGCTAGGAAGGTAAGTAC    | GTCTGTACGCTCCACATG     |
| Z9-10.4  | GCGAATCATATGGCAACAC    | CGGCGTGCTTGAAGAATT     |
| Z9-21.4  | TTCATTGCTACTCGAACGG    | GCGTGAGCAATCTATTATCC   |
| Z9-22.4  | CCATTTACACACGTTACAT    | AGTAGGCTTCTCACATTTCA   |
| Z10-8.0  | AAAGGGAAAGGAAGAACCAA   | TGGCTGGAATCTCGTACA     |
| Z10-16.6 | TGTAGTTTGCGAGGACAAG    | TAGCCCAGTGTTCAATTCTT   |
| Z11-16.9 | ACAACATCTTGCCTAAGC     | AAGCAGTATGAGGTAGAGA    |
| Z11-27.8 | GACAAATCAATAGGGCAACA   | GCACCGCCTTATTCAAAG     |
| Z12-0.9  | GTCTCAGAATTTGGCTTGTG   | CCGCATCTTGTATTCTTACC   |
| Z12-2.2  | CGATGGTTGTCACAATCTATAC | CGTCTACTTGTGTGATGGTA   |
| Z12-4.0  | GCTGGTCTTATATTAAGTAGGG | TCACGAGATTATCTGCCTAG   |
| Z12-5.2  | ACCAAACTAAGGCAGCAC     | TTAGGTCACGGAGAAGATTG   |

| Name     | Forward primer (5'-3')  | Reverse primer (3'-5')   |
|----------|-------------------------|--------------------------|
| Z12-9.4  | GTTACGGCATGGTCCTAT      | GCATAGCTCTTCTCTTTAGAC    |
| Z12-13.5 | GACCCGCCTTATCCACTT      | TTAACAAATGTCGCATCCTC     |
| Z12-16.4 | CGCCAAAGGTAATCAATCAT    | GAAGTAGAACGGTAATGTGAG    |
| Z12-18.1 | GAAAGAGCCTGTTGTTAGTT    | TGTAATTCAC TGGGAGTACC    |
| Z12-19.9 | TTGCCGAAGAACAAATGTAC    | AACCTTGTCAC TGCATCTC     |
| Z12-22.1 | ATATCAAGAGCGATGTGGTA    | CATAGTTCTGCAATGGTGTT     |
| Z12-25.2 | ACGCAAGAATGAGATGTTT     | ACGTAGAGCTGGATAAAGTA     |
| WBa2     | AGCCTCTAGAAGAAATGTGTTGC | TATATGATGAGCCCCGCCAA     |
| WBa3     | TTTGTTACGCTTGGCCCATC    | ACTCCACGTAAACACCTTTTTAT  |
| WBa7     | AAAATCGTATCAAGATTGGCGC  | GAGAGTGCGGCTCAATCG       |
| WBa9     | AGGAAGGAAGGAAAGGGGTG    | GTGTCCAACCAATCAGCTGC     |
| WBa2.8   | CCAAAGGACACCATATCTGCA   | CCGTGTGGTCTATGTGAACAG    |
| WBa3.07  | TTACGTCACGGCAAAGGGTA    | ACACTCACATTCTCAGCTGC     |
| W11-2.17 | GACTGTGACAGTGGAGGGTT    | ACCTTCCTCACCTTGGGATG     |
| W11-8.65 | TGGGGGATTGCTGATATGCA    | ACAGTTGGGCATTTTAACCAGT   |
| 24.57    | GGCTCCAGGGAAGGGAAG      | ATCCAATCCAAAACCAGCCG     |
| 25.07    | AGAGATGCAGTGCTGTATA     | GAGAGGGTGTGATCCAAA       |
| 25.15    | TTTGATCTCAACACGCGAA     | GAAATGGGTGAAGATAGTGAGCT  |
| 25.36    | CATCTACACCACGCATAGT     | TGCCCCGATTAGTATAGGTATAG  |
| 25.49    | AATTCAAGTGATGCGAGGTA    | CCATGGCCGTGGATTCAAC      |
| 25.52    | TGTCCTATCCGGTCCTAGGT    | TGAGGTGCAACATAAGCTAAAAGA |
| 25.59    | TCAACAACACTCATCCACTT    | GGAAACGAACAAGACCTATATG   |
| 25.83    | GACCCCGGCGATACTAAAGT    | ACCACATTGAAAATTTGAAGGGA  |
| 26.21    | CTCTCCTCTCGCTCAACTCC    | CTGGTTAACCAAGCAACCGT     |
| 26.44    | TCCACCTAACTCTACTCTCA    | CCTGACTGCTAGTACCATAA     |
